# Supplementary material
Source: PubMed Central journal article supplement (PMC5563765)
Supplement: 12264_2016_60_MOESM1_ESM.pdf [file 12264_2016_60_MOESM1_ESM.pdf]

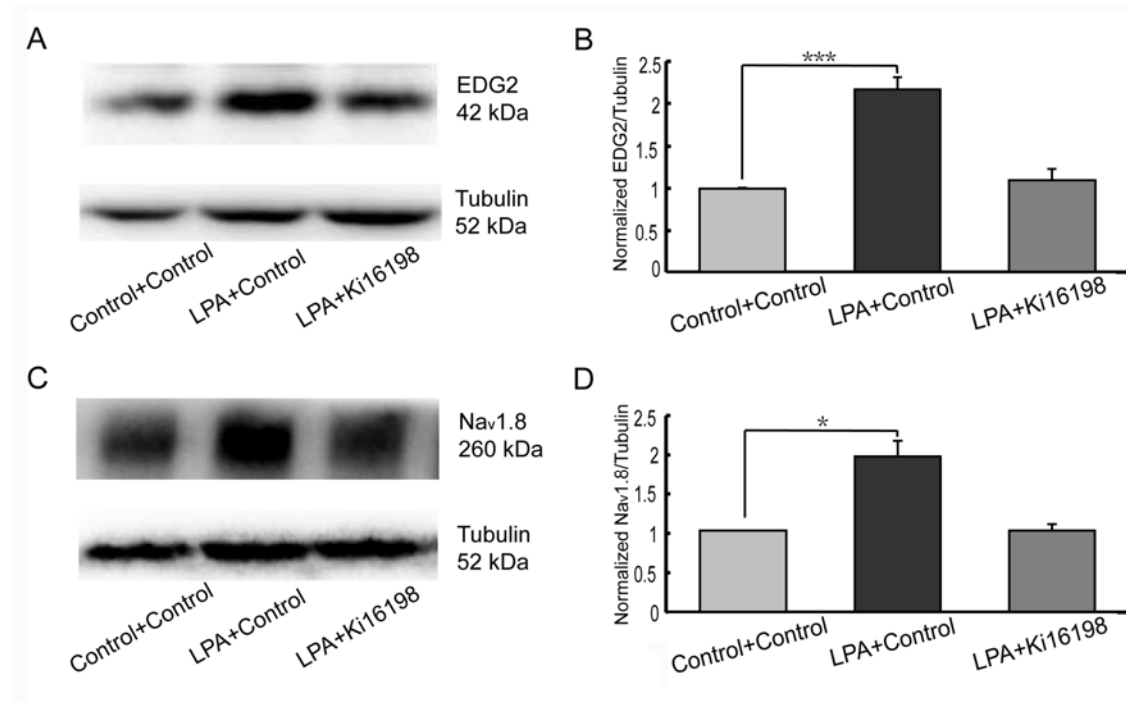

Supplemental Fig. 1. EDG2 and Nav1.8 expression on the ipsilateral L4-6 DRGs after subcutaneous injection of LPA into a hindpaw. **A, B** EDG2 expression increased after LPA injection ( $n = 6$ ). **C, D** LPA injection increased Nav1.8 expression ( $n = 6$ ). \* $P < 0.05$ , \*\*\* $P < 0.001$ .
